# Supplementary material
Source: PubMed Central journal article supplement (PMC10431413)
Supplement: as9-3-e185-s001.pdf [file as9-3-e185-s001.pdf]

**Supplementary Table 1. Elixhauser Comorbidities in Overall Sample and by Opioid Use Disorder (OUD) Status**

| n (%)                                            | All patients<br>(n= 919,601) | Patients with OUD<br>(n=11,610) | Patients without<br>OUD (n=907,991) | p-value* |
|--------------------------------------------------|------------------------------|---------------------------------|-------------------------------------|----------|
| <b>Elixhauser Comorbidities</b>                  |                              |                                 |                                     |          |
| Congestive heart failure                         | 48,452 (5.3)                 | 672 (5.8)                       | 47,780 (5.3)                        | 0.012    |
| Valvular disease                                 | 37,773 (4.1)                 | 332 (2.9)                       | 37,441 (4.1)                        | <0.001   |
| Pulmonary circulation disorders                  | 4,609 (0.5)                  | 91 (0.8)                        | 4,518 (0.5)                         | <0.001   |
| Peripheral vascular disorders                    | 64,079 (7)                   | 770 (6.6)                       | 63,309 (7)                          | 0.153    |
| Hypertension                                     | 539,790 (58.7)               | 5,710 (49.2)                    | 534,080 (58.8)                      | <0.001   |
| Paralysis                                        | 18,585 (2)                   | 369 (3.2)                       | 18,216 (2)                          | <0.001   |
| Other neurological disorders                     | 57,570 (6.3)                 | 1,069 (9.2)                     | 56,501 (6.2)                        | <0.001   |
| Chronic pulmonary disease                        | 151,089 (16.4)               | 2,826 (24.3)                    | 148,263 (16.3)                      | <0.001   |
| Diabetes, uncomplicated                          | 135,269 (14.7)               | 1,041 (9)                       | 134,228 (14.8)                      | <0.001   |
| Diabetes, complicated                            | 88,531 (9.6)                 | 1,315 (11.3)                    | 87,216 (9.6)                        | <0.001   |
| Hypothyroidism                                   | 125,079 (13.6)               | 1,389 (12)                      | 123,690 (13.6)                      | <0.001   |
| Renal failure                                    | 98,484 (10.7)                | 1,011 (8.7)                     | 97,473 (10.7)                       | <0.001   |
| Liver disease                                    | 37,201 (4.1)                 | 1,305 (11.2)                    | 35,896 (4)                          | <0.001   |
| Peptic ulcer disease                             | 8,774 (1)                    | 158 (1.4)                       | 8,616 (1)                           | <0.001   |
| AIDS                                             | 1,830 (0.2)                  | 91 (0.8)                        | 1,739 (0.2)                         | <0.001   |
| Lymphoma                                         | 4,584 (0.5)                  | 62 (0.5)                        | 4,522 (0.5)                         | 0.584    |
| Metastatic cancer                                | 25,811 (2.8)                 | 236 (2)                         | 25,575 (2.8)                        | <0.001   |
| Solid tumor without metastasis                   | 14,623 (1.6)                 | 144 (1.3)                       | 14,479 (1.6)                        | 0.002    |
| Rheumatoid arthritis/collagen vascular disorders | 30,837 (3.4)                 | 649 (5.6)                       | 30,188 (3.3)                        | <0.001   |
| Obesity                                          | 160,841 (17.5)               | 2,018 (17.4)                    | 158,823 (17.5)                      | 0.756    |
| Weight loss                                      | 36,460 (4)                   | 965 (8.3)                       | 35,495 (3.9)                        | <0.001   |
| Chronic blood-loss anemia                        | 11,050 (1.2)                 | 167 (1.4)                       | 10,883 (1.2)                        | 0.018    |
| Deficiency anemias                               | 140,049 (15.2)               | 2,449 (21.1)                    | 137,600 (15.2)                      | <0.001   |
| Alcohol abuse                                    | 32,000 (3.5)                 | 1,221 (10.5)                    | 30,779 (3.4)                        | <0.001   |
| Drug abuse                                       | 22,660 (2.5)                 | 11,610 (100)                    | 11,050 (1.2)                        | <0.001   |
| Psychoses                                        | 22,999 (2.5)                 | 1,066 (9.2)                     | 21,933 (2.4)                        | <0.001   |
| Depression                                       | 105,335 (11.5)               | 2,906 (25)                      | 102,429 (11.3)                      | <0.001   |
| Coagulopathy                                     | 39,397 (4.3)                 | 736 (6.3)                       | 38,661 (4.3)                        | <0.001   |
| Fluid and electrolyte disorders                  | 163,554 (17.8)               | 2,984 (25.7)                    | 160,570 (17.7)                      | <0.001   |

**Note:** P-values were generated from  $\chi^2$  for categorical and ANOVA for continuous variables. \*p-value <0.05; \*\*p-value <0.01; \*\*\*p-value <0.001.
